# Anesthesia

Davide Cattano, M.D., Ph.D.\*

SUCH as a forgotten sign,  
I am standing by you,  
I can see you,  
Deep in your most intimate  
Desperate reconciliation,  
Sweet of honey,  
Grace of amber and spices.  
I am letting you go now,  
Abandoning the last memory,  
Falling in space and time,  
A sharp and warm feeling,  
Lost forever in the mist,  
Floating restless the mind,  
That is not yours but mine.

\*The University of Texas, Medical School at Houston, Houston, Texas, and Anesthesia Clinic, Memorial Hermann Hospital, Houston, Texas. [davide.cattano@uth.tmc.edu](mailto:davide.cattano@uth.tmc.edu)

Accepted for publication April 3, 2012.

Copyright © 2013, the American Society of Anesthesiologists, Inc. Lippincott Williams & Wilkins. Anesthesiology 2013; 118:747
